# Supplementary material
Source: PubMed Central journal article supplement (PMC5610069)
Supplement: NIHMS892521-supplement-supplement_1.pdf [file NIHMS892521-supplement-supplement_1.pdf]

Online Table 1: Correlations between states' ranking of racial animus according to Google measure and GSS measures

| Ranking according ranking of state animus by average response to the following measures, 1990 and 2000                                                                                 | Google ranking        |
|----------------------------------------------------------------------------------------------------------------------------------------------------------------------------------------|-----------------------|
| <ul style="list-style-type: none"> <li>Blacks have worse jobs, income, and housing than white people, it's because of they have less in-born ability to learn</li> </ul>               | r=0.39<br>p=0.012     |
| <ul style="list-style-type: none"> <li>Blacks have worse jobs, income, and housing than white people, it's because of they don't have the motivation to pull out of poverty</li> </ul> | r=0.51<br>p=0.001     |
| <ul style="list-style-type: none"> <li>Whites tend to be hardworking or be lazy.</li> </ul>                                                                                            | r=0.31<br>p=0.149     |
| <ul style="list-style-type: none"> <li>Blacks tend to be hardworking or be lazy.</li> </ul>                                                                                            | r=-0.03<br>p=0.88     |
| <ul style="list-style-type: none"> <li>Whites tend to be unintelligent or intelligent.</li> </ul>                                                                                      | p=-0.24<br>p=0.149    |
| <ul style="list-style-type: none"> <li>Blacks tend to be unintelligent or intelligent.</li> </ul>                                                                                      | r=.13<br>p=0.45       |
| <ul style="list-style-type: none"> <li>Black shouldn't push themselves where they're not wanted.</li> </ul>                                                                            | 0.52<br>p=0.0007      |
| <ul style="list-style-type: none"> <li>Favoring or opposing a close relative marrying a black person.</li> </ul>                                                                       | r= -0.32<br>p = 0.048 |
| Average score for all items, 1990                                                                                                                                                      | r=0.45<br>p=0.005     |
| Average score for all items, 2000                                                                                                                                                      | r=0.45<br>p=0.004     |

Online Figure 1. Kaplan-Meier survival estimate of time to poor self-rated health among heads of household Whites (Red) and Blacks (Blue) in the Panel Study of Income Dynamics, 1990 through 2009; stratified by follow up time with those contributing less than 7 years of observation on the left and those contributing more than 10 years of observation on the right

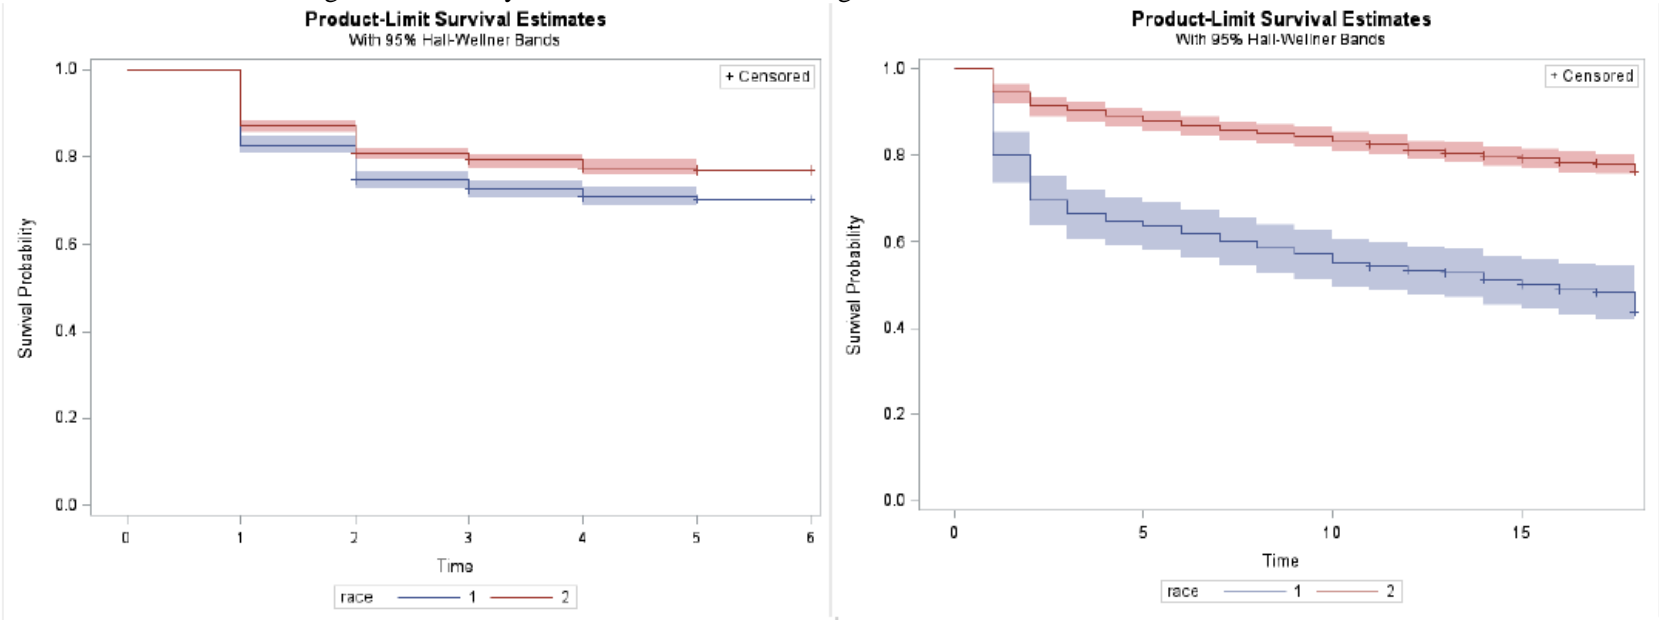

Notes.  $p < 0.001$  for the difference in curves between Blacks and Whites among both follow up time groups

**Online Tables 2 - 8: Sensitivity analysis results**

**For each analysis, a sensitivity analysis was run among those who only provided <7 years of observation (“short term group”) and those who provided >10 years of observations (“long term group”). The full sample is “the complete group” and is provided for reference, as well as in the results reported in the paper.**

**Online Table 2:** Hazard ratios of the association between race (Black vs. White) and self-rated health\* by each confounder

| Hazard ratios of the association between race (Black vs. White) and self-rated health by each covariate in the <b>short term</b> group |                     |                    | Hazard ratios of the association between race (Black vs. White) and self-rated health by each covariate in the <b>long term</b> group |                    | Hazard ratios of the association between race (Black vs. White) and self-rated health by each covariate in the <b>complete</b> group |                    |
|----------------------------------------------------------------------------------------------------------------------------------------|---------------------|--------------------|---------------------------------------------------------------------------------------------------------------------------------------|--------------------|--------------------------------------------------------------------------------------------------------------------------------------|--------------------|
|                                                                                                                                        | <i>Hazard Ratio</i> | <i>95% CI</i>      | <i>Hazard Ratio</i>                                                                                                                   | <i>95% CI</i>      | <i>Hazard Ratio</i>                                                                                                                  | <i>95% CI</i>      |
| <i>Unadjusted association</i>                                                                                                          | 1.55                | 1.21 – 1.98        | 1.70                                                                                                                                  | 1.43 – 2.02        | 1.67                                                                                                                                 | 1.34 – 2.07        |
| Adjusted for median state income in 1990                                                                                               | 1.54                | 1.19 – 2.00        | 1.67                                                                                                                                  | 1.41 – 1.98        | 1.63                                                                                                                                 | 1.30 – 2.05        |
| Adjusted for age at baseline                                                                                                           | 1.54                | 1.37 – 1.73        | 1.85                                                                                                                                  | 1.63 – 2.10        | 1.74                                                                                                                                 | 1.59 – 1.91        |
| Adjusted for education in 1990                                                                                                         | 1.44                | 1.12 – 1.86        | 1.55                                                                                                                                  | 1.32 – 1.82        | 1.54                                                                                                                                 | 1.22 – 1.93        |
| Adjusted for Google racism level of baseline state                                                                                     | 1.51                | 1.18 – 1.94        | 1.64                                                                                                                                  | 1.38 – 1.94        | 1.62                                                                                                                                 | 1.29 – 2.02        |
| <b><i>Fully adjusted model</i></b>                                                                                                     | <b>1.37</b>         | <b>1.21 – 1.54</b> | <b>1.65</b>                                                                                                                           | <b>1.44 – 1.90</b> | <b>1.54</b>                                                                                                                          | <b>1.39 – 1.71</b> |

\* *Notes.* We defined a respondent as having poor health if he/she self-rated poor or fair health in at least two consecutive interviews, starting in 1991 through 2009.

Online Table 3: Hazard ratios for the association between state-level racial animus of initial state of residence and the development of poor health in Blacks and Whites

| <b>Short term group</b>                                                                                           |              |         |      |             |       |             |
|-------------------------------------------------------------------------------------------------------------------|--------------|---------|------|-------------|-------|-------------|
| Relationship between racism quartile of <b>initial</b> state of residence and development of poor health outcomes |              |         |      |             |       |             |
| <i>Model 1: White</i>                                                                                             |              |         |      |             |       |             |
|                                                                                                                   | Poor Health* | Total N | HR   | 95% C.I.    | AHR** | 95% C.I.    |
| Highest quartile of state-level racial animus                                                                     | 33.3%        | 1522    | 1.53 | 1.20 – 1.96 | 1.30  | 1.13 – 1.49 |
| Middle high                                                                                                       | 31.9%        | 777     | 1.45 | 1.13 – 1.86 | 1.27  | 1.04 – 1.54 |
| Middle low                                                                                                        | 30.9%        | 1338    | 1.39 | 1.01 -1.92  | 1.24  | 1.03 – 1.48 |
| Lowest quartile of state-level racial animus                                                                      | 22.9%        | 480     | Ref  | Ref         | Ref   | Ref         |
| <i>Model 2: Blacks</i>                                                                                            |              |         |      |             |       |             |
|                                                                                                                   | Poor Health  | Total N | HR   | 95% CI      | AHR   | 95% CI      |
| Highest quartile of state-level racial animus                                                                     | 47.1%        | 853     | 1.35 | .93 -1.94   | 1.29  | .95 – 1.75  |
| Middle high                                                                                                       | 44.5%        | 598     | 1.27 | .85 – 1.91  | 1.45  | 1.06 – 1.98 |
| Middle low                                                                                                        | 47.5%        | 396     | 1.33 | .89 – 1.98  | 1.48  | 1.07 – 2.04 |
| Lowest quartile of state-level racial animus                                                                      | 41.1%        | 73      | Ref  | Ref         | Ref   | Ref         |
| <b>Long term group</b>                                                                                            |              |         |      |             |       |             |
| Relationship between racism quartile of <b>initial</b> state of residence and development of poor health outcomes |              |         |      |             |       |             |
| <i>Model 1: White</i>                                                                                             |              |         |      |             |       |             |
|                                                                                                                   | Poor Health  | Total N | HR   | 95% C.I.    | AHR   | 95% C.I.    |
| Highest quartile of state-level racial animus                                                                     | 70.5%        | 407     | 1.32 | 1.13 – 1.54 | 1.40  | 1.10 – 1.79 |

|                                                                                                                   |             |         |      |             |      |             |
|-------------------------------------------------------------------------------------------------------------------|-------------|---------|------|-------------|------|-------------|
| Middle high                                                                                                       | 68.7%       | 262     | 1.19 | 1.02 – 1.38 | 1.23 | 1.03 -1.46  |
| Middle low                                                                                                        | 66.9%       | 311     | 1.23 | 1.01 – 1.49 | 1.43 | 1.10 – 1.86 |
| Lowest quartile of state-level racial animus                                                                      | 61.8%       | 170     | Ref  | Ref         | Ref  | Ref         |
| <i>Model 2: Blacks</i>                                                                                            |             |         |      |             |      |             |
|                                                                                                                   | Poor Health | Total N | HR   | 95% CI      | AHR  | 95% CI      |
| Highest quartile of state-level racial animus                                                                     | 82.0%       | 316     | 1.13 | .58 – 2.20  | 1.30 | .60 – 2.84  |
| Middle high                                                                                                       | 85.0%       | 227     | 1.18 | .57 – 2.44  | 1.41 | .64 – 3.11  |
| Middle low                                                                                                        | 88.5%       | 148     | 1.29 | .65 – 2.59  | 1.65 | .77 – 3.54  |
| Lowest quartile of state-level racial animus                                                                      | 75.0%       | 12      | Ref  | Ref         | Ref  | Ref         |
| <b>Complete group</b>                                                                                             |             |         |      |             |      |             |
| Relationship between racism quartile of <b>initial</b> state of residence and development of poor health outcomes |             |         |      |             |      |             |
| <i>Model 1: White</i>                                                                                             |             |         |      |             |      |             |
|                                                                                                                   | Poor Health | Total N | HR   | 95% C.I.    | AHR  | 95% C.I.    |
| Highest quartile of state-level racial animus                                                                     | 42.1%       | 2120    | 1.44 | 1.27 – 1.63 | 1.39 | 1.20 – 1.61 |
| Middle high                                                                                                       | 41.5%       | 1171    | 1.33 | 1.17 – 1.50 | 1.30 | 1.16 – 1.46 |
| Middle low                                                                                                        | 37.8%       | 1810    | 1.28 | 1.10 – 1.48 | 1.35 | 1.20 – 1.51 |
| Lowest quartile of state-level racial animus                                                                      | 33.3%       | 733     | Ref  | Ref         | Ref  | Ref         |
| <i>Model 2: Black</i>                                                                                             |             |         |      |             |      |             |
|                                                                                                                   | Poor Health | Total N | HR   | 95% CI      | AHR  | 95% CI      |
| Highest quartile of state-level racial animus                                                                     | 59.0%       | 1351    | 1.30 | 1.03 – 1.65 | 1.36 | 1.12 – 1.66 |
| Middle high                                                                                                       | 57.9%       | 958     | 1.28 | .96 – 1.70  | 1.47 | 1.20 – 1.81 |
| Middle low                                                                                                        | 59.3%       | 607     | 1.31 | 1.04 – 1.64 | 1.58 | 1.30 – 1.90 |
| Lowest quartile of state-                                                                                         | 49.0%       | 100     | Ref  | Ref         | Ref  | Ref         |

|                     |  |  |  |  |
|---------------------|--|--|--|--|
| level racial animus |  |  |  |  |
|---------------------|--|--|--|--|

*Notes.* \*We defined a respondent as having poor health if he/she self-rated poor or fair health in at least two consecutive interviews, starting in 1991 through 2009.

\*\*Adjusted for health status in 1990, age, education level in 1990, and state-level median income in 1990.

HR=Hazard Ratio; AHR=Adjusted Hazard Ratio; CI=Confidence Interval.

Online table 4. Hazard ratios for the association between state-level racial animus of final state of residence and the development of poor health in Blacks and Whites

| <b>Short term group</b>                                                                                         |              |         |      |             |       |             |
|-----------------------------------------------------------------------------------------------------------------|--------------|---------|------|-------------|-------|-------------|
| Relationship between racism quartile of <b>final</b> state of residence and development of poor health outcomes |              |         |      |             |       |             |
| <i>Model 1: White</i>                                                                                           |              |         |      |             |       |             |
|                                                                                                                 | Poor Health* | Total N | HR   | 95% C.I.    | AHR** | 95% C.I.    |
| Highest quartile of state-level racial animus                                                                   | 31.4%        | 1063    | 1.47 | 1.13 – 1.91 | 1.25  | 1.03 – 1.52 |
| Middle high                                                                                                     | 26.3%        | 582     | 1.18 | .95 – 1.48  | 1.02  | .86 – 1.22  |
| Middle low                                                                                                      | 26.6%        | 902     | 1.20 | .88 – 1.65  | 1.09  | .86 – 1.38  |
| Lowest quartile of state-level racial animus                                                                    | 22.9%        | 388     | Ref  | Ref         | Ref   | Ref         |
| <i>Model 2: Blacks</i>                                                                                          |              |         |      |             |       |             |
|                                                                                                                 | Poor Health  | Total N | HR   | 95% CI      | AHR   | 95% CI      |
| Highest quartile of state-level racial animus                                                                   | 46.5%        | 841     | 1.26 | .90 – 1.76  | 1.28  | .92 – 1.78  |
| Middle high                                                                                                     | 43.5%        | 575     | 1.19 | .83 – 1.70  | 1.47  | 1.06 – 2.02 |
| Middle low                                                                                                      | 47.4%        | 386     | 1.29 | .90 – 1.84  | 1.48  | 1.06 – 2.06 |
| Lowest quartile of state-level racial animus                                                                    | 40.3%        | 67      | Ref  | Ref         | Ref   | Ref         |
| <b>Long term group</b>                                                                                          |              |         |      |             |       |             |
| Relationship between racism quartile of <b>final</b> state of residence and development of poor health outcomes |              |         |      |             |       |             |
| <i>Model 1: White</i>                                                                                           |              |         |      |             |       |             |
|                                                                                                                 | Poor Health  | Total N | HR   | 95% C.I.    | AHR   | 95% C.I.    |
| Highest quartile of state-level racial animus                                                                   | 70.4%        | 422     | 1.30 | 1.14 – 1.47 | 1.33  | 1.07 – 1.65 |
| Middle high                                                                                                     | 64.9%        | 259     | 1.06 | .90 – 1.25  | 1.10  | .95 – 1.26  |
| Middle low                                                                                                      | 68.3%        | 306     | 1.21 | .99 – 1.49  | 1.28  | .98 – 1.68  |

|                                                                                                                 |             |         |      |             |      |             |
|-----------------------------------------------------------------------------------------------------------------|-------------|---------|------|-------------|------|-------------|
| Lowest quartile of state-level racial animus                                                                    | 61.3%       | 150     | Ref  | Ref         | Ref  | Ref         |
| <i>Model 2: Blacks</i>                                                                                          |             |         |      |             |      |             |
|                                                                                                                 | Poor Health | Total N | HR   | 95% CI      | AHR  | 95% CI      |
| Highest quartile of state-level racial animus                                                                   | 81.5%       | 313     | .88  | .52 – 1.47  | .78  | .47 – 1.30  |
| Middle high                                                                                                     | 84.3%       | 223     | .94  | .50 -1.78   | .87  | .51 – 1.47  |
| Middle low                                                                                                      | 87.7%       | 146     | 1.02 | .59 – 1.76  | 1.01 | .65 – 1.58  |
| Lowest quartile of state-level racial animus                                                                    | 91.7%       | 12      | Ref  | Ref         | Ref  | Ref         |
| <b>Complete group</b>                                                                                           |             |         |      |             |      |             |
| Relationship between racism quartile of <b>final</b> state of residence and development of poor health outcomes |             |         |      |             |      |             |
| <i>Model 1: White</i>                                                                                           |             |         |      |             |      |             |
|                                                                                                                 | Poor Health | Total N | HR   | 95% C.I.    | AHR  | 95% C.I.    |
| Highest quartile of state-level racial animus                                                                   | 43.4%       | 1687    | 1.39 | 1.28 – 1.51 | 1.33 | 1.20 – 1.47 |
| Middle high                                                                                                     | 39.3%       | 956     | 1.16 | 1.08 – 1.23 | 1.13 | 1.04 – 1.22 |
| Middle low                                                                                                      | 37.1%       | 1373    | 1.17 | 1.08 – 1.27 | 1.19 | 1.07 – 1.32 |
| Lowest quartile of state-level racial animus                                                                    | 34.2%       | 630     | Ref  | Ref         | Ref  | Ref         |
| <i>Model 2: Black</i>                                                                                           |             |         |      |             |      |             |
|                                                                                                                 | Poor Health | Total N | HR   | 95% CI      | AHR  | 95% CI      |
| Highest quartile of state-level racial animus                                                                   | 58.6%       | 1334    | 1.20 | .97 – 1.48  | 1.20 | .95 – 1.50  |
| Middle high                                                                                                     | 57.0%       | 927     | 1.17 | .922 – 1.50 | 1.31 | 1.05 – 1.63 |
| Middle low                                                                                                      | 59.3%       | 597     | 1.23 | .99 – 1.42  | 1.43 | 1.12 – 1.82 |
| Lowest quartile of state-level racial animus                                                                    | 50.5%       | 93      | Ref  | Ref         | Ref  | Ref         |



*Notes.* \*We defined a respondent as having poor health if he/she self-rated poor or fair health in at least two consecutive interviews, starting in 1991 through 2009.

\*\*Adjusted for health status in 1990, age, education level in 1990, and state-level median income in 1990.

HR=Hazard Ratio; AHR=Adjusted Hazard Ratio; CI=Confidence Interval.

**Online Table 5:** Association between race and state-level racial animus: 1990 and 2009

| Association between race and state-level racial animus |                  |            |         |                 |            |         |                |            |         |
|--------------------------------------------------------|------------------|------------|---------|-----------------|------------|---------|----------------|------------|---------|
| Based on <b>initial</b> state of residence             |                  |            |         |                 |            |         |                |            |         |
|                                                        | Short term group |            |         | Long term group |            |         | Complete group |            |         |
|                                                        | Blacks (%)       | Whites (%) | Total N | Blacks (%)      | Whites (%) | Total N | Blacks (%)     | Whites (%) | Total N |
| Highest quartile of state-level racial animus          | 43.8%            | 35.9%      | 851     | 43.3%           | 32.1%      | 1766    | 44.0%          | 34.3%      | 5876    |
| Middle high                                            | 31.3%            | 20.1%      | 2482    | 33.8%           | 23.7%      | 1332    | 32.3%          | 21.3%      | 3912    |
| Middle low                                             | 20.8%            | 31.7%      | 2105    | 20.1%           | 26.7%      | 1224    | 20.1%          | 2.98%      | 4165    |
| Lowest                                                 | 4.1%             | 12.4%      | 3412    | 2.8%            | 17.5%      | 644     | 3.7%           | 14.6%      | 1719    |
| Total                                                  | 2937             | 5913       | 8850    | 1539            | 3427       | 4966    | 5202           | 10470      | 15672   |
| <i>Chi-square</i>                                      | p<.0001          |            |         | p<.0001         |            |         | p<.0001        |            |         |
| Association between race and state-level racial animus |                  |            |         |                 |            |         |                |            |         |
| Based on <b>final</b> state of residence               |                  |            |         |                 |            |         |                |            |         |
|                                                        | Short term group |            |         | Long term group |            |         | Complete group |            |         |
|                                                        | Blacks (%)       | Whites (%) | Total N | Blacks (%)      | Whites (%) | Total N | Blacks (%)     | Whites (%) | Total N |
| Highest quartile of state-level racial animus          | 44.3%            | 35.3%      | 2851    | 43.4%           | 33.0%      | 1601    | 44.2%          | 34.1%      | 5081    |
| Middle high                                            | 31.0%            | 21.0%      | 1824    | 34.0%           | 23.4%      | 1183    | 32.2%          | 21.7%      | 3429    |
| Middle low                                             | 20.9%            | 30.2%      | 1962    | 20.7%           | 27.7%      | 1146    | 20.4%          | 29.4%      | 3549    |

|                   |         |       |      |         |       |      |         |       |       |
|-------------------|---------|-------|------|---------|-------|------|---------|-------|-------|
| Lowest            | 3.9%    | 13.5% | 725  | 1.9%    | 15.9% | 528  | 3.3%    | 14.8% | 1453  |
| Total             | 2792    | 4570  | 7362 | 1297    | 4170  | 4467 | 4714    | 8798  | 13512 |
| <i>Chi-square</i> | p<.0001 |       |      | p<.0001 |       |      | p<.0001 |       |       |

**Online Table 6:** Self-rated health at baseline predicting whether individuals moved (in or out of state) after 1990, by race

| Baseline health predicting any movement after 1990, Whites, Short Term Group |                      |                              |         |      |                |      |                  |
|------------------------------------------------------------------------------|----------------------|------------------------------|---------|------|----------------|------|------------------|
|                                                                              | Never moved<br>N (%) | Moved at least once<br>N (%) | Total N | OR   | 95% CI         | AOR* | 95% CI           |
| Good                                                                         | 3.2%                 | 96.8%                        | 1306    | 2.03 | 0.80 –<br>5.19 | 2.06 | 0.92 –<br>4.60   |
| Fair/Poor                                                                    | 1.3%                 | 19.7%                        | 348     | Ref  | Ref            | Ref  | Ref              |
| Total                                                                        | 64                   | 1590                         | 1654    |      |                |      |                  |
| Baseline health predicting any movement after 1990, Blacks, Short Term Group |                      |                              |         |      |                |      |                  |
| Health in<br>1990                                                            | Never moved<br>N (%) | Moved at least once<br>N(%)  | Total N | OR   | 95% CI         | AOR* | 95% CI           |
| Good                                                                         | 3.0%                 | 97.0%                        | 496     | 2.24 | 1.73 –<br>2.90 | 1.98 | 1.43 –<br>2.74   |
| Fair/Poor                                                                    | 6.5%                 | 93.5%                        | 399     | Ref  | Ref            | Ref  | Ref              |
| Total                                                                        | 41                   | 854                          | 895     |      |                |      |                  |
| Baseline health predicting any movement after 1990, Whites, Long Term Group  |                      |                              |         |      |                |      |                  |
|                                                                              | Never moved<br>N (%) | Moved at least once<br>N (%) | Total N | OR   | 95% CI         | AOR* | 95% CI           |
| Good                                                                         | 6.9%                 | 93.1%                        | 1014    | 3.10 | 1.97 –<br>4.90 | 2.71 | 1.80 –<br>4.07   |
| Fair/Poor                                                                    | 18.7%                | 81.3%                        | 155     | Ref  | Ref            | Ref  | Ref              |
| Total                                                                        | 99                   | 1070                         | 1169    |      |                |      |                  |
| Baseline health predicting any movement after 1990, Blacks, Long Term Group  |                      |                              |         |      |                |      |                  |
| Health in<br>1990                                                            | Never moved<br>N (%) | Moved at least once<br>N(%)  | Total N | OR   | 95% CI         | AOR* | 95% CI           |
| Good                                                                         | 9.7%                 | 90.3%                        | 372     | 0.87 | 0.47 –<br>1.61 | 0.57 | (0.33 –<br>0.99) |
| Fair/Poor                                                                    | 8.5%                 | 91.5%                        | 165     | Ref  | Ref            | Ref  | Ref              |
| Total                                                                        | 50                   | 487                          | 537     |      |                |      |                  |

| Baseline health predicting any movement after 1990, Whites, Complete Group |                      |                              |         |      |                |      |                |
|----------------------------------------------------------------------------|----------------------|------------------------------|---------|------|----------------|------|----------------|
|                                                                            | Never moved<br>N (%) | Moved at least once<br>N (%) | Total N | OR   | 95% CI         | AOR* | 95% CI         |
| Good                                                                       | 4.7%                 | 95.3%                        | 2957    | 2.24 | 0.78 –<br>6.44 | 2.17 | 0.98 –<br>4.81 |
| Fair/Poor                                                                  | 10.0%                | 90.0%                        | 610     | Ref  | Ref            | Ref  | Ref            |
| Total                                                                      | 201                  | 3366                         | 3567    |      |                |      |                |

| Baseline health predicting any movement after 1990, Blacks, Complete Group |                      |                             |         |      |                |      |            |
|----------------------------------------------------------------------------|----------------------|-----------------------------|---------|------|----------------|------|------------|
| Health in<br>1990                                                          | Never moved<br>N (%) | Moved at least once<br>N(%) | Total N | OR   | 95% CI         | AOR* | 95% CI     |
| Good                                                                       | 5.6%                 | 94.4%                       | 1162    | 1.32 | 1.02 –<br>1.72 | 1.03 | .78 – 1.36 |
| Fair/Poor                                                                  | 7.3%                 | 93.7%                       | 744     | Ref  | Ref            | Ref  | Ref        |
| Total                                                                      | 119                  | 1787                        | 1906    |      |                |      |            |

\*Adjusted for age, education level in 1990, and state-level median income in 1990.

OR=Odds Ratio; OHR=Adjusted Odds Ratio; CI=Confidence Interval.

**Online Table 7:** Self-rated health at baseline predicting whether individuals moved out of state after 1990, by race

| Baseline health predicting different final state than initial state, <b>Blacks</b> |                 |                    |         |      |             |             |             |
|------------------------------------------------------------------------------------|-----------------|--------------------|---------|------|-------------|-------------|-------------|
|                                                                                    | Stayed in state | Moved out of state | Total N | OR   | 95 %CI      | AOR*        | 95% CI      |
| <b>Short term</b>                                                                  |                 |                    |         |      |             |             |             |
| % in good health at baseline                                                       | 90.2%           | 9.8%               | 581     | 1.18 | 1.05 – 1.31 | <b>1.37</b> | 1.16 – 1.63 |
| % in poor health at baseline                                                       | 91.5%           | 8.5%               | 449     | Ref  | Ref         | Ref         | Ref         |
| Chi square                                                                         | p = .49         |                    |         |      |             |             |             |
| <b>Long term</b>                                                                   |                 |                    |         |      |             |             |             |
| % in good health at baseline                                                       | 74.6%           | 25.4%              | 397     | 1.15 | .90 – 1.46  | <b>1.01</b> | .77 – 1.33  |
| % in poor health at baseline                                                       | 77.1%           | 22.9%              | 179     | Ref  | Ref         | Ref         | Ref         |
| Chi square                                                                         | p = .51         |                    |         |      |             |             |             |
| <b>Complete</b>                                                                    |                 |                    |         |      |             |             |             |
| % in good health at baseline                                                       | 83.1%           | 16.9%              | 1283    | 1.32 | 1.16 – 1.50 | <b>1.26</b> | 1.08 – 1.49 |
| % in poor health at baseline                                                       | 86.6%           | 13.4%              | 821     | Ref  | Ref         | Ref         | Ref         |
| Chi square                                                                         | p = .03         |                    |         |      |             |             |             |

| Baseline health predicting different final state than initial state, <b>Whites</b> |                 |                    |         |      |             |             |             |
|------------------------------------------------------------------------------------|-----------------|--------------------|---------|------|-------------|-------------|-------------|
|                                                                                    | Stayed in state | Moved out of state | Total N | OR   | 95 %CI      | AOR         | 95% CI      |
| <b>Short term</b>                                                                  |                 |                    |         |      |             |             |             |
| % in good health at baseline                                                       | 81.4%           | 18.6%              | 1532    | .96  | .84 – 1.10  | <b>1.03</b> | .92 – 1.15  |
| % in poor health at baseline                                                       | 80.8%           | 19.2%              | 432     | Ref  | Ref         | Ref         | Ref         |
| Chi square                                                                         | p = .77         |                    |         |      |             |             |             |
| <b>Long term</b>                                                                   |                 |                    |         |      |             |             |             |
| % in good health at baseline                                                       | 71.9%           | 28.1%              | 1063    | 2.70 | 1.90 – 3.85 | <b>2.44</b> | 1.58 – 3.77 |
| % in poor health at baseline                                                       | 87.4%           | 12.7%              | 166     | Ref  | Ref         | Ref         | Ref         |
| Chi square                                                                         | p<.0001         |                    |         |      |             |             |             |
| <b>Complete</b>                                                                    |                 |                    |         |      |             |             |             |
| % in good health at baseline                                                       | 78.2%           | 21.8%              | 3243    | 1.38 | .95 – 2.02  | <b>1.31</b> | .98 - 1.75  |
| % in poor health at baseline                                                       | 83.2%           | 16.8%              | 715     | Ref  | Ref         | Ref         | Ref         |
| Chi square                                                                         | p = .003        |                    |         |      |             |             |             |

| Baseline health predicting different final state than initial state, <b>Blacks who have ever moved</b> |                 |                    |         |      |             |             |             |
|--------------------------------------------------------------------------------------------------------|-----------------|--------------------|---------|------|-------------|-------------|-------------|
|                                                                                                        | Stayed in state | Moved out of state | Total N | OR   | 95 %CI      | AOR         | 95% CI      |
| <b>Short term</b>                                                                                      |                 |                    |         |      |             |             |             |
| % in good health at baseline                                                                           | 90.0%           | 10.0%              | 481     | 1.14 | 1.05 – 1.24 | <b>1.33</b> | 1.14 – 1.54 |
| % in poor health at baseline                                                                           | 91.2%           | 8.8%               | 373     | Ref  | Ref         | Ref         | Ref         |
| Chi square                                                                                             | p = .58         |                    |         |      |             |             |             |
| <b>Long term</b>                                                                                       |                 |                    |         |      |             |             |             |
| % in good health at baseline                                                                           | 75.6%           | 24.4%              | 336     | 1.11 | .85 – 1.45  | <b>.95</b>  | .68 – 1.33  |
| % in poor health at baseline                                                                           | 77.5%           | 22.5%              | 151     | Ref  | Ref         | Ref         | Ref         |
| Chi square                                                                                             | p = .65         |                    |         |      |             |             |             |
| <b>Complete</b>                                                                                        |                 |                    |         |      |             |             |             |
| % in good health at baseline                                                                           | 83.1%           | 16.9%              | 1097    | 1.30 | 1.15 – 1.48 | <b>1.20</b> | 1.02 – 1.42 |
| % in poor health at baseline                                                                           | 86.5%           | 13.5%              | 690     | Ref  | Ref         | Ref         | Ref         |
| Chi square                                                                                             | p = .05         |                    |         |      |             |             |             |
| Baseline health predicting different final state than initial state, <b>Whites who have ever moved</b> |                 |                    |         |      |             |             |             |



|                                                                                                                                                       | Stayed in state | Moved out of state | Total N | OR   | 95 %CI      | AOR         | 95% CI      |
|-------------------------------------------------------------------------------------------------------------------------------------------------------|-----------------|--------------------|---------|------|-------------|-------------|-------------|
| <b>Short term</b>                                                                                                                                     |                 |                    |         |      |             |             |             |
| <b>% in good health at baseline</b>                                                                                                                   | 81.4%           | 18.6%              | 1264    | .95  | .89 – 1.02  | <b>1.03</b> | .97 – 1.10  |
| <b>% in poor health at baseline</b>                                                                                                                   | 80.7%           | 19.3%              | 326     | Ref  | Ref         | Ref         | Ref         |
| <b>Chi square</b>                                                                                                                                     | p = .76         |                    |         |      |             |             |             |
| <b>Long term</b>                                                                                                                                      |                 |                    |         |      |             |             |             |
| <b>% in good health at baseline</b>                                                                                                                   | 72.3%           | 27.7%              | 944     | 2.64 | 2.02 – 3.45 | <b>2.47</b> | 1.67 – 3.64 |
| <b>% in poor health at baseline</b>                                                                                                                   | 87.3%           | 12.7%              | 126     | Ref  | Ref         | Ref         | Ref         |
| <b>Chi square</b>                                                                                                                                     | p = .0003       |                    |         |      |             |             |             |
| <b>Complete</b>                                                                                                                                       |                 |                    |         |      |             |             |             |
| <b>% in good health at baseline</b>                                                                                                                   | 78.2%           | 21.8%              | 2817    | 1.37 | 1.14 – 1.65 | <b>1.31</b> | 1.15 - 1.51 |
| <b>% in poor health at baseline</b>                                                                                                                   | 83.1%           | 16.9%              | 549     | Ref  | Ref         | Ref         | Ref         |
| <b>Chi square</b>                                                                                                                                     | p = .01         |                    |         |      |             |             |             |
| *Adjusted for age, education level in 1990, and state-level median income in 1990.<br>OR=Odds Ratio; OHR=Adjusted Odds Ratio; CI=Confidence Interval. |                 |                    |         |      |             |             |             |

**Online Table 8:** The association between baseline health and movement across racism categories

| Among <b>black subjects</b> does baseline health predict movement to a more/less racist state? |                          |                      |                          |          |
|------------------------------------------------------------------------------------------------|--------------------------|----------------------|--------------------------|----------|
| <b>Short term</b>                                                                              |                          |                      |                          |          |
|                                                                                                | <b>More racist state</b> | <b>Same quartile</b> | <b>Less racist state</b> | <b>N</b> |
| <b>% in good health at baseline</b>                                                            | 2.2%                     | 90.5%                | 7.2%                     | 581      |
| <b>% in poor health at baseline</b>                                                            | 1.3%                     | 93.3%                | 5.5%                     | 449      |
| <b>Chi square</b>                                                                              | p = .25                  |                      |                          |          |
|                                                                                                | <b>More racist state</b> | <b>Same quartile</b> | <b>Less racist state</b> |          |
| <b>OR* for good vs poor baseline health</b>                                                    | 1.69                     | .69                  | 1.38                     |          |
| <b>95% CI for good vs poor baseline health</b>                                                 | 1.43 – 2.00              | .61 - .77            | 1.18 – 1.62              |          |
| <b>AOR for good vs poor baseline health</b>                                                    | 3.11                     | .57                  | 1.50                     |          |
| <b>Adjusted 95% CI for good vs poor baseline health</b>                                        | 2.11 – 4.58              | .47 - .69            | 1.18 – 1.91              |          |
| <b>Long term</b>                                                                               |                          |                      |                          |          |
|                                                                                                | <b>More racist state</b> | <b>Same quartile</b> | <b>Less racist state</b> | <b>N</b> |

|                                                         |                          |                      |                          |          |
|---------------------------------------------------------|--------------------------|----------------------|--------------------------|----------|
| <b>% in good health at baseline</b>                     | 3.5%                     | 76.1%                | 20.4%                    | 397      |
| <b>% in poor health at baseline</b>                     | 1.1%                     | 82.1%                | 16.8%                    | 179      |
| <b>Chi square</b>                                       | p = .13                  |                      |                          |          |
|                                                         | <b>More racist state</b> | <b>Same quartile</b> | <b>Less racist state</b> |          |
| <b>OR for good vs poor baseline health</b>              | 3.24                     | .69                  | 1.27                     |          |
| <b>95% CI for good vs poor baseline health</b>          | 2.82 – 3.72              | .53 - .91            | .97 – 1.68               |          |
| <b>AOR for good vs poor baseline health</b>             | 4.59                     | .77                  | 1.06                     |          |
| <b>Adjusted 95% CI for good vs poor baseline health</b> | 3.42 – 6.18              | .56 – 1.06           | .77 – 1.45               |          |
| <b>Complete</b>                                         |                          |                      |                          |          |
|                                                         | <b>More racist state</b> | <b>Same quartile</b> | <b>Less racist state</b> | <b>N</b> |
| <b>% in good health at baseline</b>                     | 2.6%                     | 84.2%                | 13.3%                    | 1283     |
| <b>% in poor health at baseline</b>                     | 1.8%                     | 88.8%                | 9.4%                     | 821      |
| <b>Chi square</b>                                       | p = .01                  |                      |                          |          |
|                                                         | <b>More racist state</b> | <b>Same quartile</b> | <b>Less racist state</b> |          |

|                                                         |             |           |             |
|---------------------------------------------------------|-------------|-----------|-------------|
| <b>OR for good vs poor baseline health</b>              | 1.42        | .67       | 1.48        |
| <b>95% CI for good vs poor baseline health</b>          | 1.27 – 1.58 | .58 - .77 | 1.26 – 1.73 |
| <b>AOR for good vs poor baseline health</b>             | 2.07        | .71       | 1.30        |
| <b>Adjusted 95% CI for good vs poor baseline health</b> | 1.63 – 2.63 | .60 - .85 | 1.07 – 1.58 |
|                                                         |             |           |             |

|                                                                                                |                          |                      |                          |          |
|------------------------------------------------------------------------------------------------|--------------------------|----------------------|--------------------------|----------|
| Among <b>white subjects</b> does baseline health predict movement to a more/less racist state? |                          |                      |                          |          |
| <b>Short term</b>                                                                              |                          |                      |                          |          |
|                                                                                                | <b>More racist state</b> | <b>Same quartile</b> | <b>Less racist state</b> | <b>N</b> |
| <b>% in good health at baseline</b>                                                            | 2.5%                     | 83.5%                | 14.0%                    | 1532     |
| <b>% in poor health at baseline</b>                                                            | .2%                      | 81.7%                | 18.1%                    | 432      |
| <b>Chi square</b>                                                                              | p= .002                  |                      |                          |          |
|                                                                                                | <b>More racist state</b> | <b>Same quartile</b> | <b>Less racist state</b> |          |
| <b>OR for good vs poor baseline health</b>                                                     | 11.26                    | 1.13                 | .74                      |          |
| <b>95% CI for good vs poor baseline health</b>                                                 | 9.02 – 14.05             | .97 – 1.32           | .62 - .88                |          |

|                                                         |                          |                      |                          |          |
|---------------------------------------------------------|--------------------------|----------------------|--------------------------|----------|
| <b>AOR for good vs poor baseline health</b>             | 7.38                     | 1.02                 | .86                      |          |
| <b>Adjusted 95% CI for good vs poor baseline health</b> | 6.10 - 8.94              | .89 – 1.17           | .75 – 1.00               |          |
| <b>Long term</b>                                        |                          |                      |                          |          |
|                                                         | <b>More racist state</b> | <b>Same quartile</b> | <b>Less racist state</b> | <b>N</b> |
| <b>% in good health at baseline</b>                     | 8.5%                     | 75.8%                | 15.7%                    | 1063     |
| <b>% in poor health at baseline</b>                     | 3.6%                     | 88.6%                | 7.8%                     | 166      |
| <b>Chi square</b>                                       | p = .001                 |                      |                          |          |
|                                                         | <b>More racist state</b> | <b>Same quartile</b> | <b>Less racist state</b> |          |
| <b>OR for good vs poor baseline health</b>              | 2.47                     | .41                  | 2.19                     |          |
| <b>95% CI for good vs poor baseline health</b>          | 1.51 – 4.02              | .28 - .59            | 1.56 – 3.09              |          |
| <b>AOR for good vs poor baseline health</b>             | 1.71                     | .44                  | 2.40                     |          |
| <b>Adjusted 95% CI for good vs poor baseline health</b> | .79 – 3.67               | .28 - .68            | 1.91 – 3.03              |          |
| <b>Complete</b>                                         |                          |                      |                          |          |
|                                                         | <b>More racist state</b> | <b>Same quartile</b> | <b>Less racist state</b> | <b>N</b> |

|                                                                                                                                                       |                          |                      |                          |      |
|-------------------------------------------------------------------------------------------------------------------------------------------------------|--------------------------|----------------------|--------------------------|------|
| <b>% in good health at baseline</b>                                                                                                                   | 5.1%                     | 81.1%                | 13.8%                    | 3243 |
| <b>% in poor health at baseline</b>                                                                                                                   | 1.4%                     | 84.5%                | 14.1%                    | 715  |
| <b>Chi square</b>                                                                                                                                     | p<.0001                  |                      |                          |      |
|                                                                                                                                                       | <b>More racist state</b> | <b>Same quartile</b> | <b>Less racist state</b> |      |
| <b>OR for good vs poor baseline health</b>                                                                                                            | 3.78                     | .79                  | .98                      |      |
| <b>95% CI for good vs poor baseline health</b>                                                                                                        | 4.05 – 4.69              | .50 – 1.23           | .60 – 1.59               |      |
| <b>AOR for good vs poor baseline health</b>                                                                                                           | 2.52                     | .80                  | 1.05                     |      |
| <b>Adjusted 95% CI for good vs poor baseline health</b>                                                                                               | 1.71 – 3.74              | .57 – 1.12           | .76 – 1.45               |      |
| *Adjusted for age, education level in 1990, and state-level median income in 1990.<br>OR=Odds Ratio; OHR=Adjusted Odds Ratio; CI=Confidence Interval. |                          |                      |                          |      |
